# Supplementary material for: Development of an Optimized Medium, Strain and High-Throughput Culturing Methods for Methylobacterium extorquens
Source: PLOS journal article supplement (doi:10.1371/journal.pone.0062957), 2013-04-30

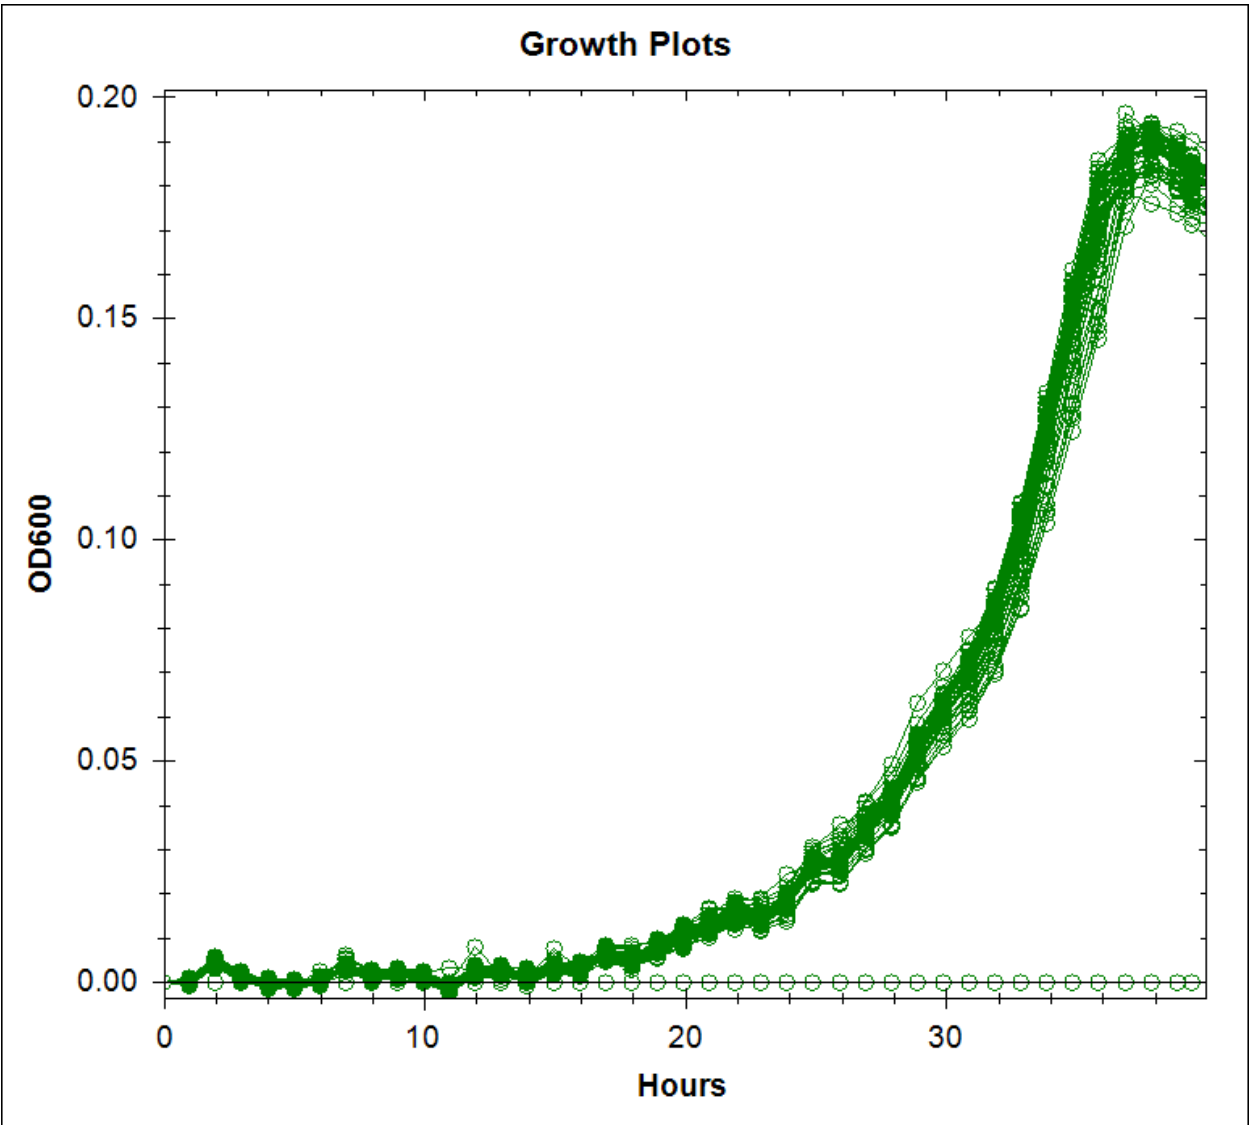

Supplement: S1 (10.1371/journal.pone.0062957.s001) [file journal.pone.0062957.s001]
